# Supplementary figures and images for: Synthesis, crystal structure and thermal properties of Ca6(C12H14O4)4(CO3)(OH)2(H2O)x – a 3D inorganic hybrid material
Source: Royal Society of Chemistry journal article supplement (doi:10.1039/c2dt30651d), 2012-01-01

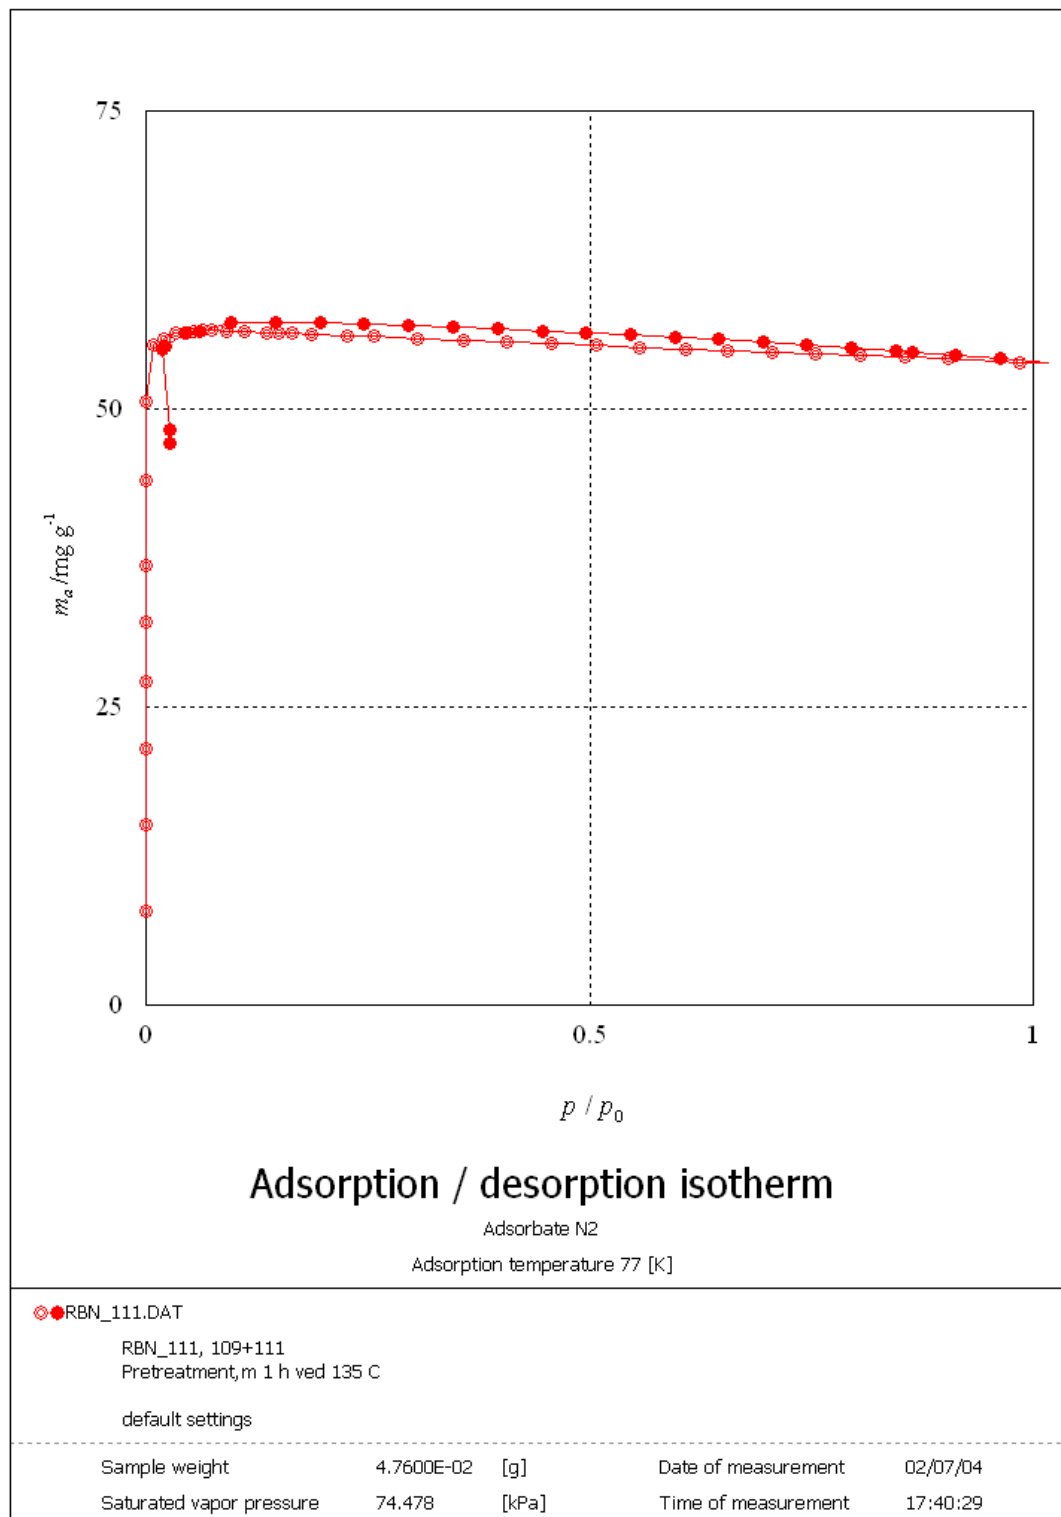

Figure S1: The adsorption and desorption isotherms for N<sub>2</sub> at 77 K.

Supplement: c2dt30651d.pdf [file c2dt30651d.pdf]
